# Supplementary material for: A promising nanocomposite from CNTs and nano-ceria: nanostructured fillers in polyurethane coatings for surface protection
Source: Royal Society of Chemistry journal article supplement (doi:10.1039/c5ra09224h), 2015-01-01

# **A Promising Nanocomposite from CNTs and Nano Ceria: Nano-structured Fillers in Polyurethane Coatings for Surface Protection**

**A.Madhan Kumar\*, M.Mizanur Rahman and Zuhair M.Gasem**

Center of Research Excellence in Corrosion, Research Institute

King Fahd University of Petroleum and Minerals, Dhahran, Saudi Arabia – 31261

Figure S1 IR spectra of pristine CNTs

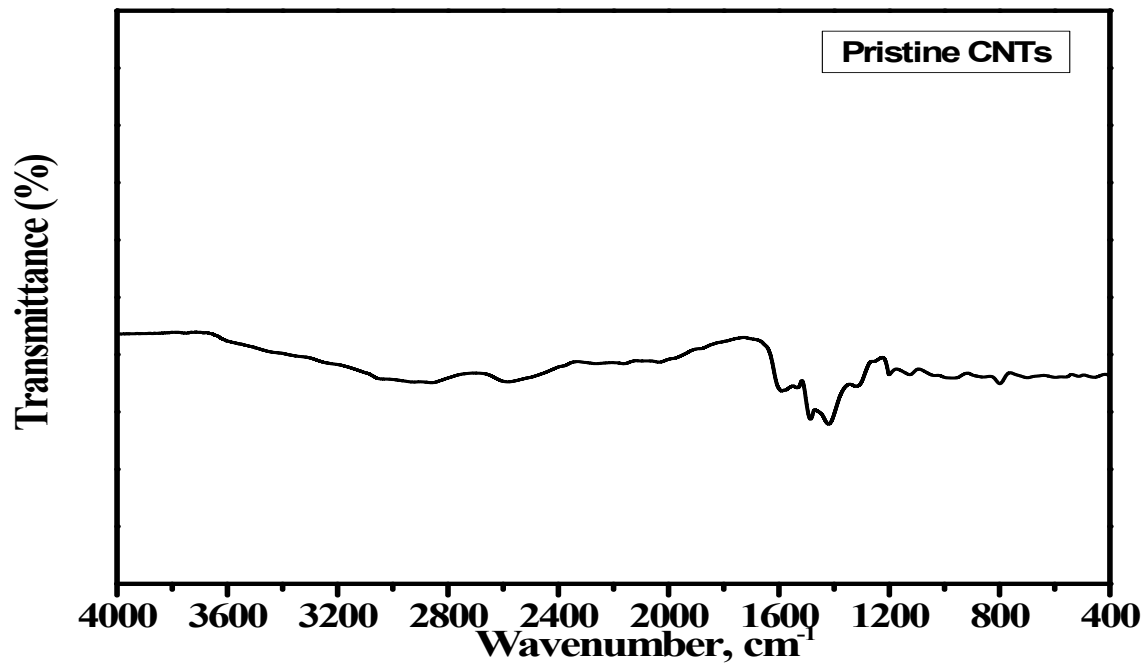

Figure S2 SEM/EDAX results for synthesized CeO<sub>2</sub> nanoparticles

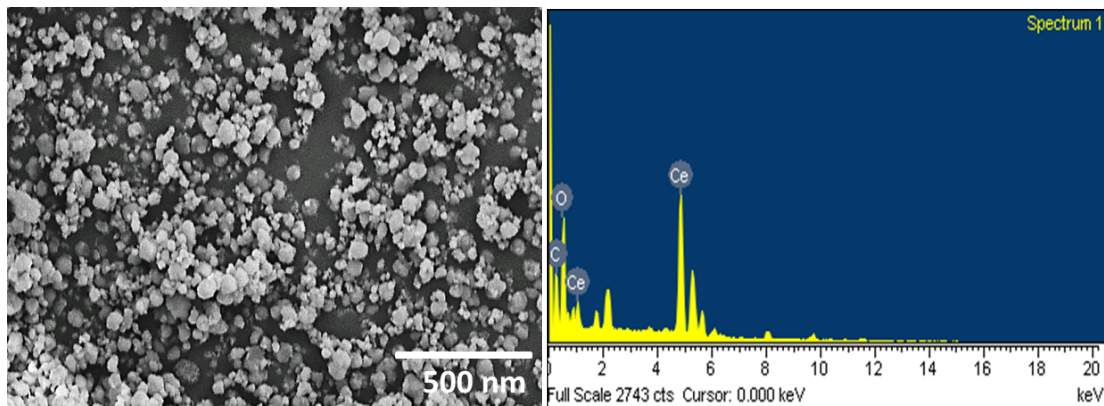

Figure S3

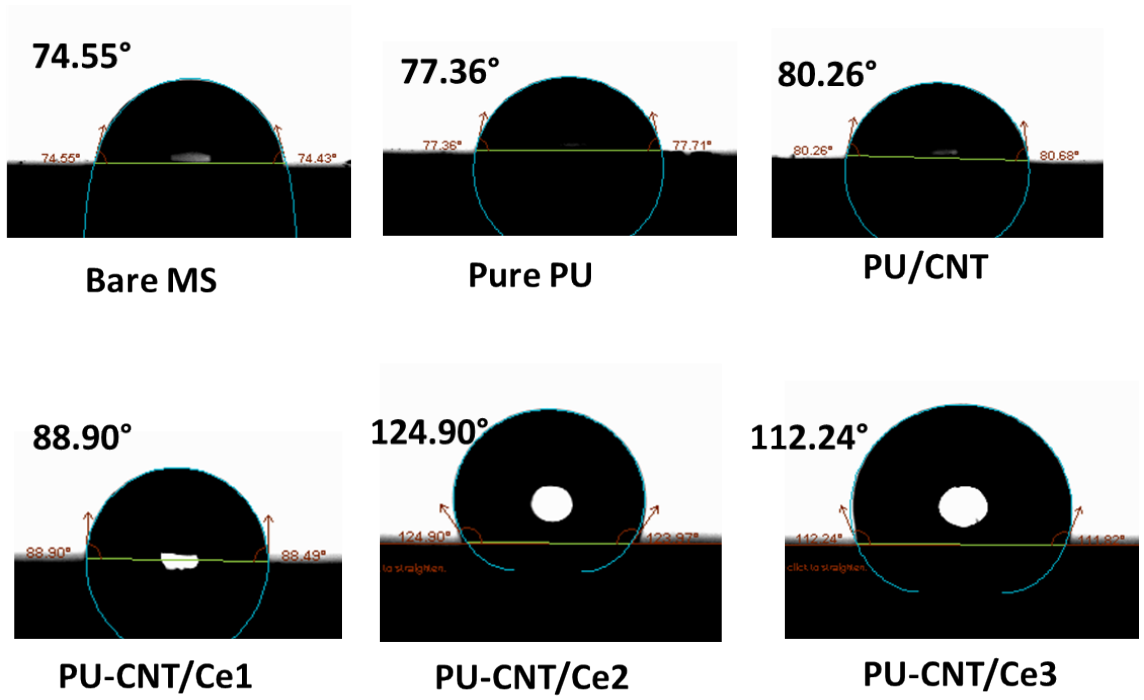

Figure S4

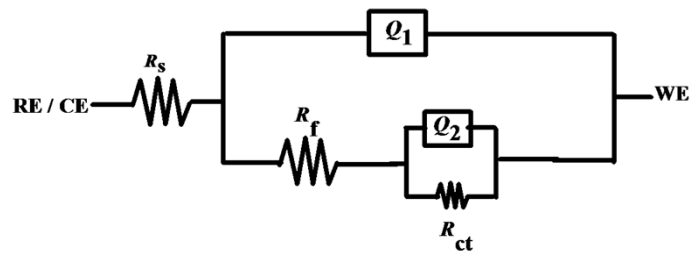

Figure S5

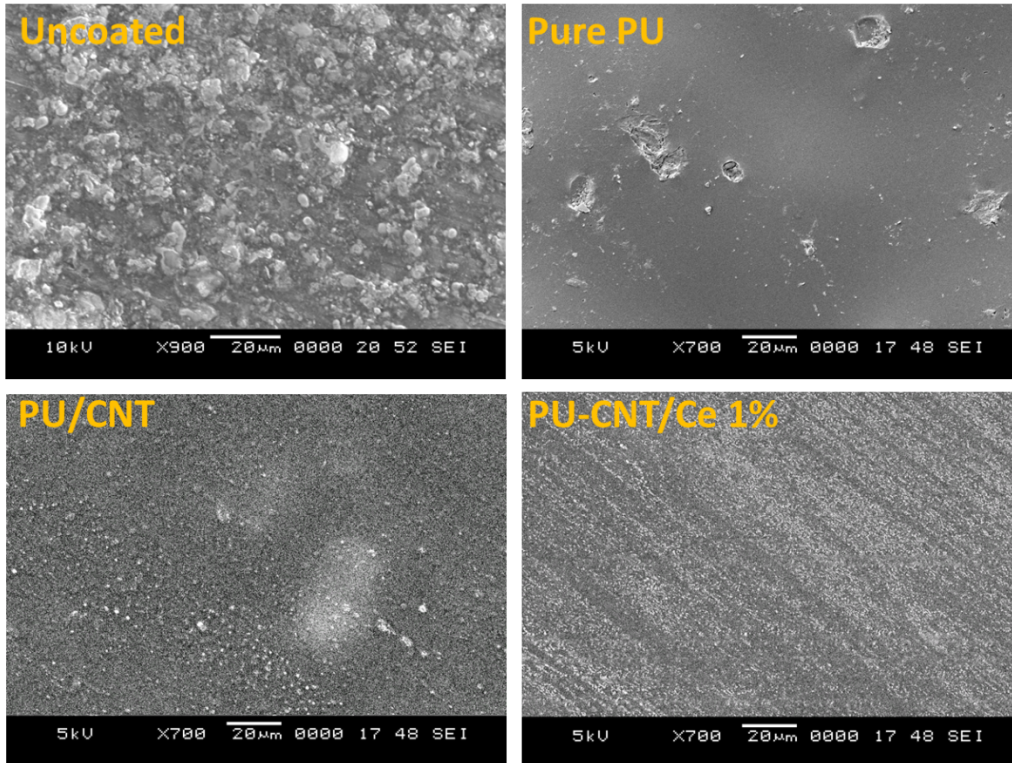

Supplement: c5ra09224h1.pdf [file c5ra09224h1.pdf]
